# Supplementary material
Source: publisher figshare collection journal article supplement (https://karger.figshare.com/ndownloader/files/36506193)
Supplement: Supplementary file 1 [file 36506193]

**Supplementary Table 1:** Percent prevalence of obesity (BMI ≥ 30 kg/m2) according to smoking status, by country, in 2010 (PPACTE study) and 2017-2018 (TackSHS survey). Prevalence estimates for the overall population were computed weighting each country in proportion to the country-specific adult population.

| Country | Current smokers | | | Non smokers | | |
| --- | --- | --- | --- | --- | --- | --- |
| 2010  PPACTE | 2017-18  TackSHS | Δ (%) | 2010  PPACTE | 2017-18  TackSHS | Δ (%) |
| Bulgaria | 10.2 | 18.2 | +78.4 | 14.0 | 20.4 | +45.7 |
| England | 18.1 | 18.3 | +1.1 | 20.8 | 19.2 | -7.7 |
| France | 7.0 | 8.1 | +15.7 | 14.3 | 9.1 | -36.4 |
| Ireland | 9.4 | 18.6 | +97.9 | 13.8 | 18.3 | +32.6 |
| Italy | 5.0 | 7.2 | +44.0 | 8.4 | 7.6 | -9.5 |
| Latvia | 12.3 | 15.1 | +22.8 | 17.8 | 20.9 | +17.4 |
| Poland | 7.4 | 8.8 | +18.9 | 11.6 | 15.7 | +35.3 |
| Romania | 9.4 | 16.1 | +71.3 | 18.5 | 23.6 | +27.6 |
| Spain | 8.4 | 9.8 | +16.7 | 16.4 | 17.6 | +7.3 |
| **TOTAL** | 9.1 | 11.1 | +21.3 | 14.5 | 14.2 | -2.0 |
